# Supplementary material for: Structural and Computational Insights into New Nano-sized Cu(II) Metal- Organic Coordination Particles: Synthesis, Crystal Analysis, and Hirshfeld Surface Analysis
Source: Research Square preprint supplement (doi:10.21203/rs.3.rs-6016481/v1), 2025-02-19
Supplement: Supplementary file 1 [file 9b7b7b9606e40a5a7781071b.docx]

**Structural and Computational Insights into New Nano-sized Cu(II) Metal-Organic Coordination Particles: Synthesis, Crystal Analysis, and Hirshfeld Surface Analysis**

Halimeh rajabzadeh * a

Department of Chemistry, Dezful Branch, Islamic Azad University, Dezful, Iran E-mail: R.rajabzadeh77@gmail.com

**Table S1.** Local chemical reactivity of the Cu(II) in selected level of theory.

| **Atoms** | **F+** | **F-** | **s+** | **s-** | **w+** | **w-** |
| --- | --- | --- | --- | --- | --- | --- |
| **1 Cu** | **0.0114** | **-0.0229** | **0.0232** | **-0.0464** | **0.0066** | **-0.0133** |
| **2 O** | **-0.0036** | **0.0139** | **-0.0073** | **0.0281** | **-0.0021** | **0.0080** |
| 3 H | -0.0003 | -0.0143 | -0.0006 | -0.0291 | -0.0002 | -0.0083 |
| 4 H | 0.0083 | -0.0069 | 0.0169 | -0.0140 | 0.0048 | -0.0040 |
| **5 O** | **0.0728** | **0.0336** | **0.1479** | **0.0682** | **0.0422** | **0.0195** |
| **6 O** | **0.0721** | **0.0289** | **0.1464** | **0.0586** | **0.0418** | **0.0167** |
| 7 C | 0.0345 | -0.0094 | 0.0701 | -0.0190 | 0.0200 | -0.0054 |
| **8 N** | **-0.0239** | **0.0045** | **-0.0486** | **0.0091** | **-0.0139** | **0.0026** |
| **9 N** | **-0.0249** | **-0.0371** | **-0.0506** | **-0.0753** | **-0.0144** | **-0.0215** |
| 10 C | -0.0011 | -0.0688 | -0.0023 | -0.1396 | -0.0007 | -0.0399 |
| 11 H | -0.0114 | -0.0506 | -0.0231 | -0.1027 | -0.0066 | -0.0293 |
| 12 C | 0.0014 | 0.0108 | 0.0028 | 0.0219 | 0.0008 | 0.0063 |
| 13 H | 0.0094 | -0.0537 | 0.0190 | -0.1090 | 0.0054 | -0.0312 |
| 14 C | 0.0108 | -0.0520 | 0.0218 | -0.1056 | 0.0062 | -0.0302 |
| 15 H | 0.0139 | -0.0499 | 0.0282 | -0.1014 | 0.0081 | -0.0290 |
| 16 C | -0.0027 | 0.0420 | -0.0054 | 0.0853 | -0.0016 | 0.0244 |
| 17 C | 0.0063 | -0.0585 | 0.0127 | -0.1187 | 0.0036 | -0.0339 |
| 18 C | 0.0071 | -0.0293 | 0.0145 | -0.0594 | 0.0041 | -0.0170 |
| 19 C | -0.0035 | 0.0480 | -0.0072 | 0.0975 | -0.0021 | 0.0279 |
| 20 C | 0.0112 | -0.0711 | 0.0227 | -0.1443 | 0.0065 | -0.0412 |
| 21 H | 0.0138 | -0.0575 | 0.0279 | -0.1168 | 0.0080 | -0.0334 |
| 22 C | 0.0011 | 0.0143 | 0.0022 | 0.0290 | 0.0006 | 0.0083 |
| 23 H | 0.0095 | -0.0601 | 0.0193 | -0.1220 | 0.0055 | -0.0349 |
| 24 C | -0.0009 | -0.0706 | -0.0017 | -0.1433 | -0.0005 | -0.0410 |
| 25 H | -0.0107 | -0.0586 | -0.0218 | -0.1190 | -0.0062 | -0.0340 |
| 26 C | 0.0053 | -0.0864 | 0.0108 | -0.1753 | 0.0031 | -0.0501 |
| 27 H | 0.0124 | -0.0804 | 0.0252 | -0.1632 | 0.0072 | -0.0466 |
| 28 C | 0.0061 | -0.0955 | 0.0124 | -0.1938 | 0.0035 | -0.0554 |
| 29 H | 0.0124 | -0.0799 | 0.0253 | -0.1622 | 0.0072 | -0.0464 |
| **30 Cu** | **0.5603** | **-0.0028** | **1.1374** | **-0.0056** | **0.3250** | **-0.0016** |
| **31 O** | **-0.0237** | **0.0001** | **-0.0482** | **0.0003** | **-0.0138** | **0.0001** |
| 32 H | 0.0309 | 0.0023 | 0.0628 | 0.0047 | 0.0179 | 0.0013 |
| 33 H | 0.0286 | -0.0033 | 0.0580 | -0.0067 | 0.0166 | -0.0019 |
| **34 O** | **-0.0489** | **-0.0249** | **-0.0994** | **-0.0506** | **-0.0284** | **-0.0145** |
| **35 O** | **-0.0505** | **-0.0249** | **-0.1025** | **-0.0505** | **-0.0293** | **-0.0144** |
| 36 C | 0.0321 | -0.0081 | 0.0652 | -0.0164 | 0.0186 | -0.0047 |
| **37 N** | **-0.1827** | **0.0101** | **-0.3709** | **0.0205** | **-0.1060** | **0.0059** |
| **38 N** | **-0.1848** | **0.0108** | **-0.3752** | **0.0219** | **-0.1072** | **0.0062** |
| 39 C | 0.0483 | 0.0014 | 0.0980 | 0.0028 | 0.0280 | 0.0008 |
| 40 H | 0.0226 | 0.0082 | 0.0459 | 0.0166 | 0.0131 | 0.0047 |
| 41 C | -0.0010 | 0.0000 | -0.0021 | 0.0000 | -0.0006 | 0.0000 |
| 42 H | 0.0366 | -0.0038 | 0.0742 | -0.0077 | 0.0212 | -0.0022 |
| 43 C | 0.0410 | -0.0060 | 0.0833 | -0.0121 | 0.0238 | -0.0035 |
| 44 H | 0.0379 | -0.0083 | 0.0770 | -0.0168 | 0.0220 | -0.0048 |
| 45 C | -0.0118 | 0.0016 | -0.0240 | 0.0033 | -0.0069 | 0.0009 |
| 46 C | 0.0772 | -0.0024 | 0.1568 | -0.0048 | 0.0448 | -0.0014 |
| 47 C | 0.0826 | -0.0029 | 0.1678 | -0.0059 | 0.0479 | -0.0017 |
| 48 C | -0.0144 | 0.0022 | -0.0292 | 0.0044 | -0.0083 | 0.0013 |
| 49 C | 0.0433 | -0.0062 | 0.0879 | -0.0125 | 0.0251 | -0.0036 |
| 50 H | 0.0379 | -0.0082 | 0.0769 | -0.0167 | 0.0220 | -0.0048 |
| 51 C | -0.0029 | 0.0000 | -0.0060 | -0.0001 | -0.0017 | 0.0000 |
| 52 H | 0.0364 | -0.0043 | 0.0738 | -0.0086 | 0.0211 | -0.0025 |
| 53 C | 0.0488 | 0.0010 | 0.0990 | 0.0021 | 0.0283 | 0.0006 |
| 54 H | 0.0227 | 0.0073 | 0.0461 | 0.0149 | 0.0132 | 0.0043 |
| 55 C | 0.0162 | -0.0028 | 0.0329 | -0.0057 | 0.0094 | -0.0016 |
| 56 H | 0.0312 | -0.0077 | 0.0633 | -0.0156 | 0.0181 | -0.0044 |
| 57 C | 0.0181 | -0.0034 | 0.0368 | -0.0070 | 0.0105 | -0.0020 |
| 58 H | 0.0313 | -0.0078 | 0.0636 | -0.0157 | 0.0182 | -0.0045 |


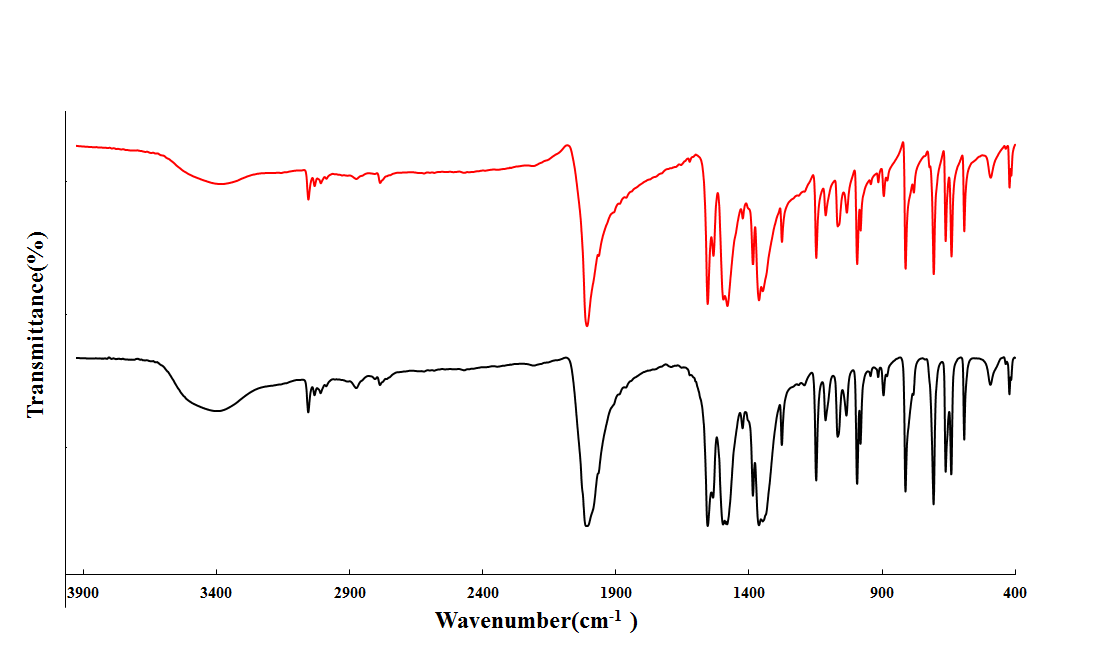


**Fig. S1.** The IR spectra of, 1-1 obtained by ultra-sonication (red line), 1- 2 simulated from single-crystal X-Ray data of **1** (black line).

**
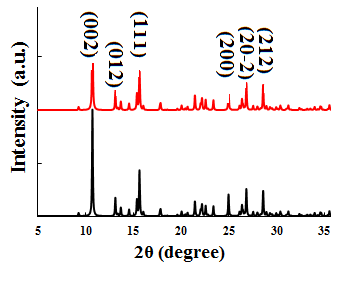
**

**Fig.S2.** The PXRD patterns of nano-sized 1-1 obtained by ultra-sonication (black line) and simulated from single-crystal X-Ray data of **1** (red line).
